# Supplementary material for: Should we use a simple or complex model for moisture recycling and atmospheric moisture tracking?
Source: Copernicus journal article supplement (doi:10.5194/hess-17-4869-2013), 2013-12-06
Supplement: Supplementary file 1 [file hess-17-4869-2013-supplement.zip]

Archive with 8 entries (8 files):
- Movie1_Volta_fate18RCM_tag_x264.mp4
- Movie2_Volta_fate18WAM1_x264.mp4
- Movie3_Volta_fate18-3DT_new_x264.mp4
- Movie4_Volta_fate18WAM2_x264.mp4
- Movie5_Volta_fate18-3DT_lowmixing_new_x264.mp4
- Movie6_Volta_fate18-3DT-cloud_lowmixing_new_x264.mp4
- Movie captions.txt
- Supplementary_Figure_vanderEnt.pdf
