# Supplementary material for: Should we use a simple or complex model for moisture recycling and atmospheric moisture tracking?
Source: Copernicus journal article supplement (doi:10.5194/hess-17-4869-2013), 2013-12-06
Supplement: Supplementary file 1 [file hess-17-4869-2013-supplement.zip › Movie captions.txt]

Movie 1. Atmospheric moisture of Volta origin in August 1998 at intervals of one hour as computed by RCM tag. The yellow rectangle indicates the Lake Volta tagging-source region.

Movie 2. Atmospheric moisture of Volta origin in August 1998 at intervals of one hour as computed by WAM. The yellow rectangle indicates the Lake Volta tagging-source region.

Movie 3. Atmospheric moisture of Volta origin in August 1998 at intervals of one hour as computed by 3D-T. The yellow rectangle indicates the Lake Volta tagging-source region.

Movie 4. Atmospheric moisture of Volta origin in August 1998 at intervals of one hour as computed by WAM-2layers. The yellow rectangle indicates the Lake Volta tagging-source region.

Movie 5. Atmospheric moisture of Volta origin in August 1998 at intervals of one hour as computed by 3D-T-E_lowmixing-P_well-mixing. The yellow rectangle indicates the Lake Volta tagging-source region.

Movie 6. Atmospheric moisture of Volta origin in August 1998 at intervals of one hour as computed by 3D-T-E_lowmixing-P_fromclouds. The yellow rectangle indicates the Lake Volta tagging-source region.
