# Supplementary material for: Should we use a simple or complex model for moisture recycling and atmospheric moisture tracking?
Source: Copernicus journal article supplement (doi:10.5194/hess-17-4869-2013), 2013-12-06
Supplement: Supplementary file 1 [file hess-17-4869-2013-supplement.zip › Supplementary_Figure_vanderEnt.pdf]

**RCM-tag**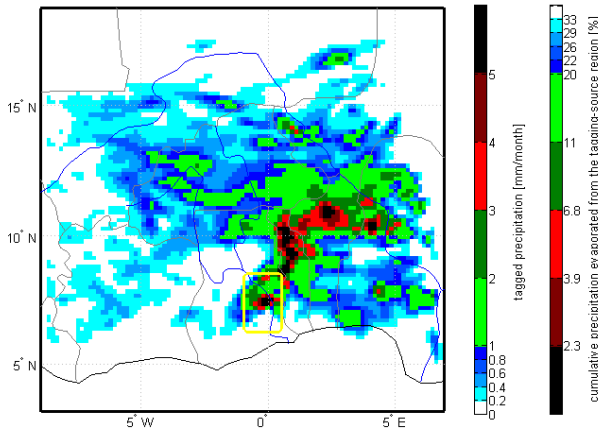**3D-T**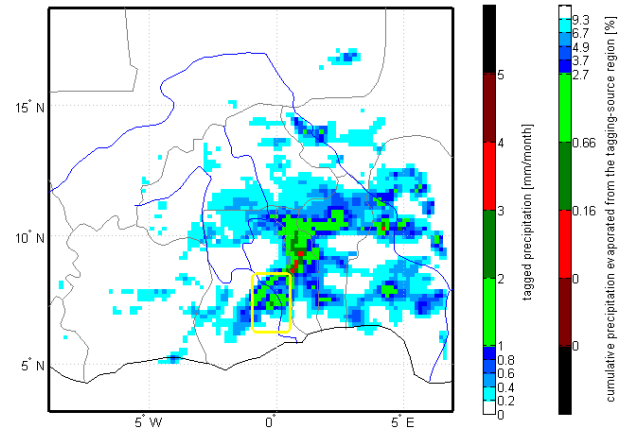**WAM**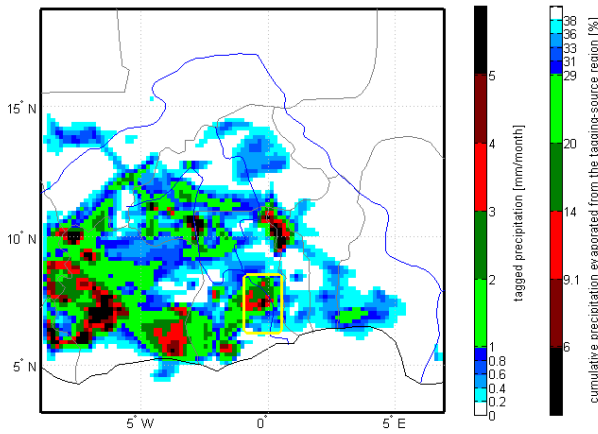**3D-T-E\_lowmixing-P\_wellmixing**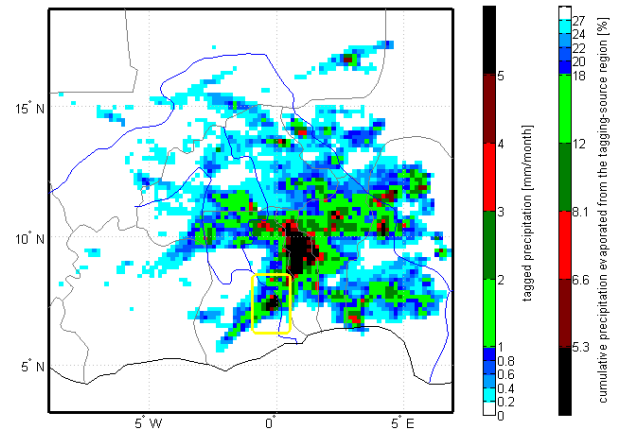**WAM-2layers**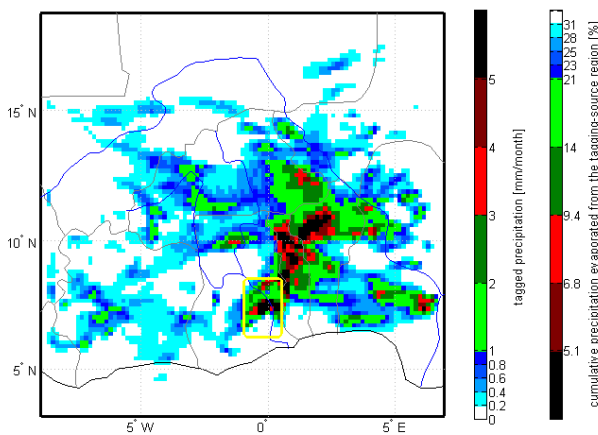**3D-T-E\_lowmixing-P\_from clouds**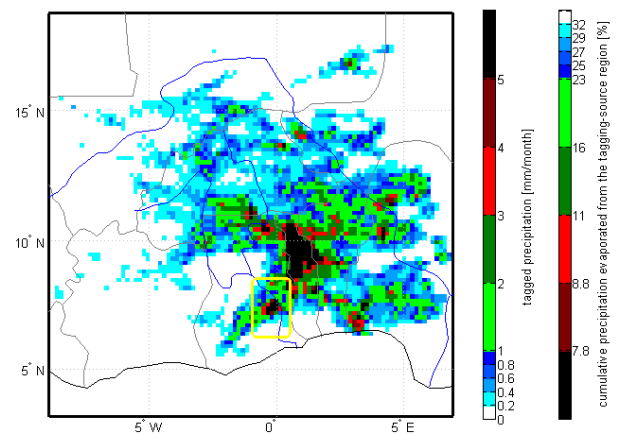

**Fig. S1.** Precipitation of Volta origin August 1998 as computed by the six moisture tracking runs used in this study. RCM-tag is considered “virtual reality”. The panels are identical to Figs. 3-8 in the paper. The yellow rectangles indicate the Lake Volta tagging-source region. The left colour bars indicate the absolute amount of precipitation that originated from Lake Volta. The right colour bars indicate for which percentage the precipitation in the coloured areas accounts for the evaporation from the tagging-source region.
